# Supplementary material
Source: Springer Nature journal article supplement (https://www.springermedizin.de/resource/supplementary/12913_2013_2873_MOESM1_ESM.pdf/9531734)
Supplement: MOESM1 [file 9531734]

**Eligible PCUs: 43**  
(patients assigned to 448 medical positions)

**Randomization**

Intervention: 21 PCUs  
Physicians: 213  
Baseline measurements  
(PRE)

Control: 22 PCUs  
Physicians: 235  
Baseline measurements  
(PRE)

Multifaceted intervention

Usual implementation

Post-intervention  
measurements  
(POST)

Post-intervention  
measurements  
(POST)

Data extraction and analysis
